# Supplementary material for: Intraovarian PRP injection improves oocyte quality and early embryo development in mouse models of chemotherapy-induced diminished ovarian reserve
Source: publisher site journal article supplement (doi:10.18632/aging.206099), 2024-09-13
Supplement: Supplementary file [file aging-v16i17-206099-supplementary-material-SD1.pdf]

**SUPPLEMENTARY FIGURES**

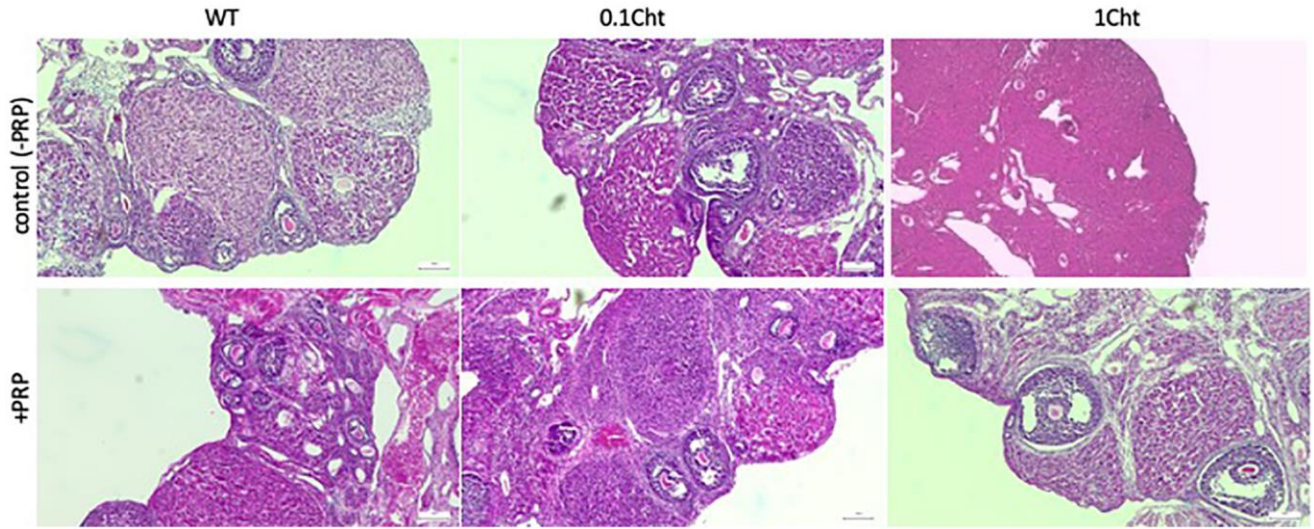

**Supplementary Figure 1. Histological assessment of ovarian stroma.** Hematoxylin-Eosin high magnification images of ovarian stroma and follicles from the wild type, 0.1Cht and 1Cht models.

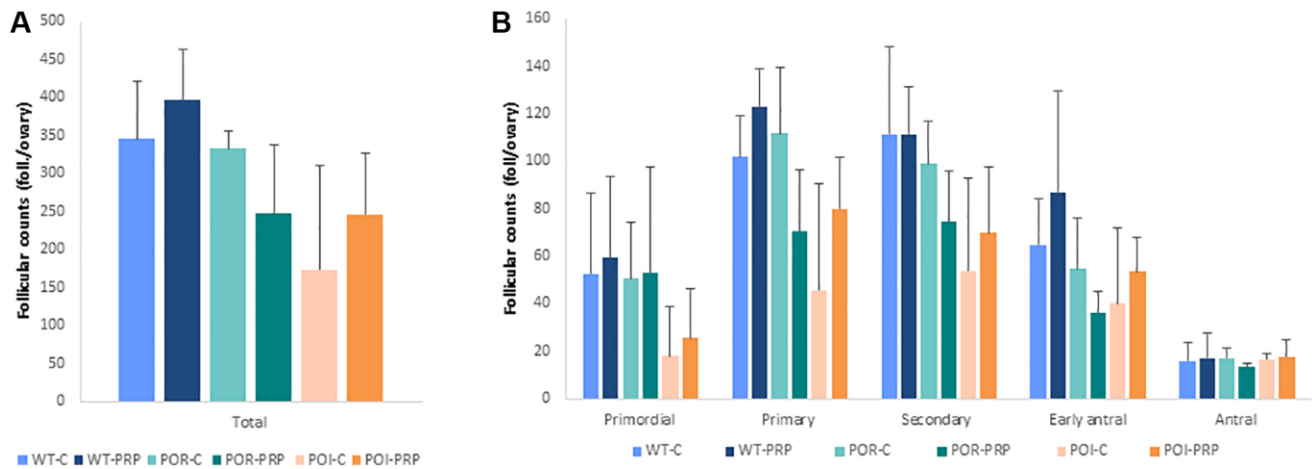

**Supplementary Figure 2. Follicular counts in the CD1 model.** (A) Total follicle counts. (B) Follicle subpopulations. Data are presented as mean ± SD. Follicles per ovary; \* $p < 0.05$ .

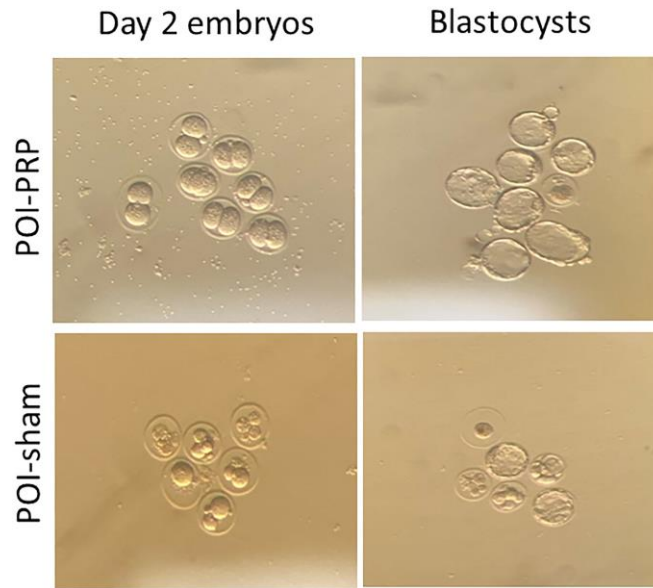

Supplementary Figure 3. Images of Day 2 embryos and blastocyst obtained from the POI-PRP and the POI-sham groups in the CD1 model.

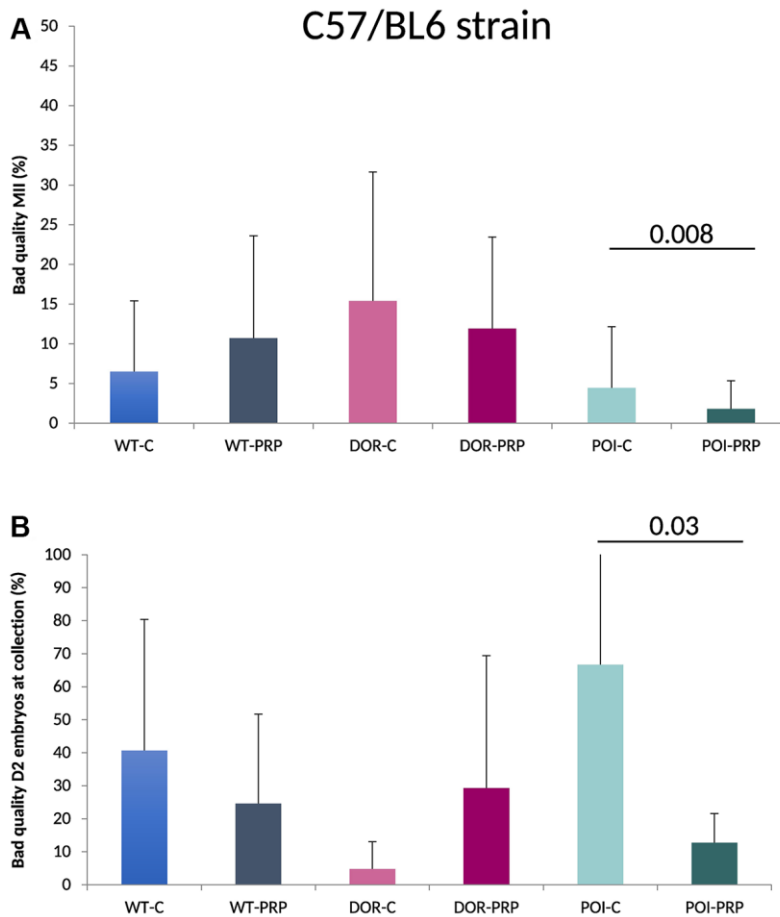

Supplementary Figure 4. Oocyte and embryo quality at collection in the C57/BL6 strain. (A) Percentage of bad quality MII oocytes at recovery. (B) Percentage of bad quality Day 2 embryos at collection.
