# Supplementary material for: Intraovarian PRP injection improves oocyte quality and early embryo development in mouse models of chemotherapy-induced diminished ovarian reserve
Source: publisher site journal article supplement (doi:10.18632/aging.206099), 2024-09-13
Supplement: Supplementary file [file aging-v16i17-206099-supplementary-material-SD2.pdf]

## SUPPLEMENTARY TABLE

**Supplementary Table 1. Chemotherapy effects in the ovarian reserve of the C57/Bl6.**

| <b>C57BL/6 foll./ovary</b> | <b>WT</b>    | <b>POR</b>    | <b>POI</b>   |
|----------------------------|--------------|---------------|--------------|
| <b>Primordial</b>          | 54.3 ± 18.9  | 44.3 ± 27.6   | 0.3 ± 0.6*   |
| <b>Primary</b>             | 113.7 ± 38.4 | 93.7 ± 37.2   | 36.7 ± 2.5*  |
| <b>Secondary</b>           | 108.0 ± 42.2 | 100.0 ± 53.0  | 25.3 ± 17.1* |
| <b>Early antral</b>        | 4.7 ± 3.5    | 7.3 ± 3.1     | 3.0 ± 2.6    |
| <b>Antral</b>              | 11.0 ± 3.6   | 8.3 ± 2.5     | 8.3 ± 7.2    |
| <b>Total</b>               | 291.7 ± 97.1 | 253.7 ± 122.7 | 73.7 ± 22.1* |

\* $p < 0.05$ , using Kruskal-Wallis in the comparison as indicated and Mann-Whitney U-tests for two-by-two comparisons.
